# Supplementary material
Source: publisher figshare collection journal article supplement (https://sage.figshare.com/ndownloader/files/17823140)

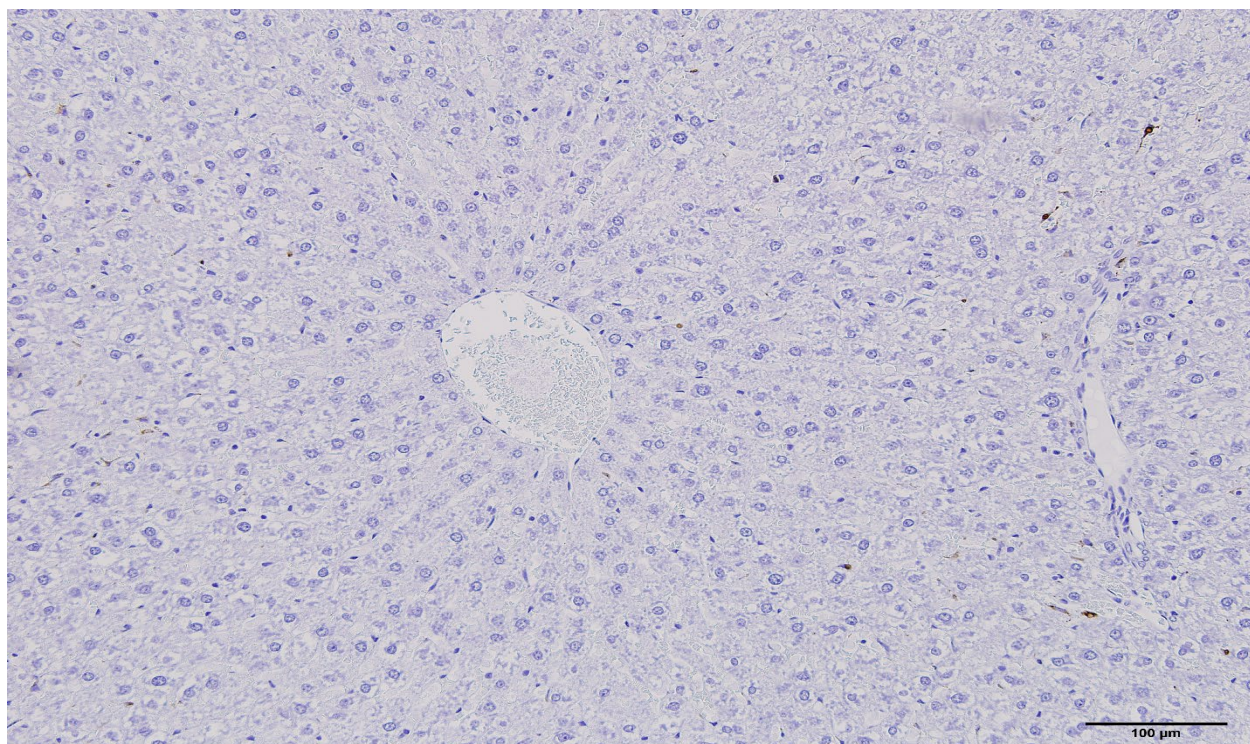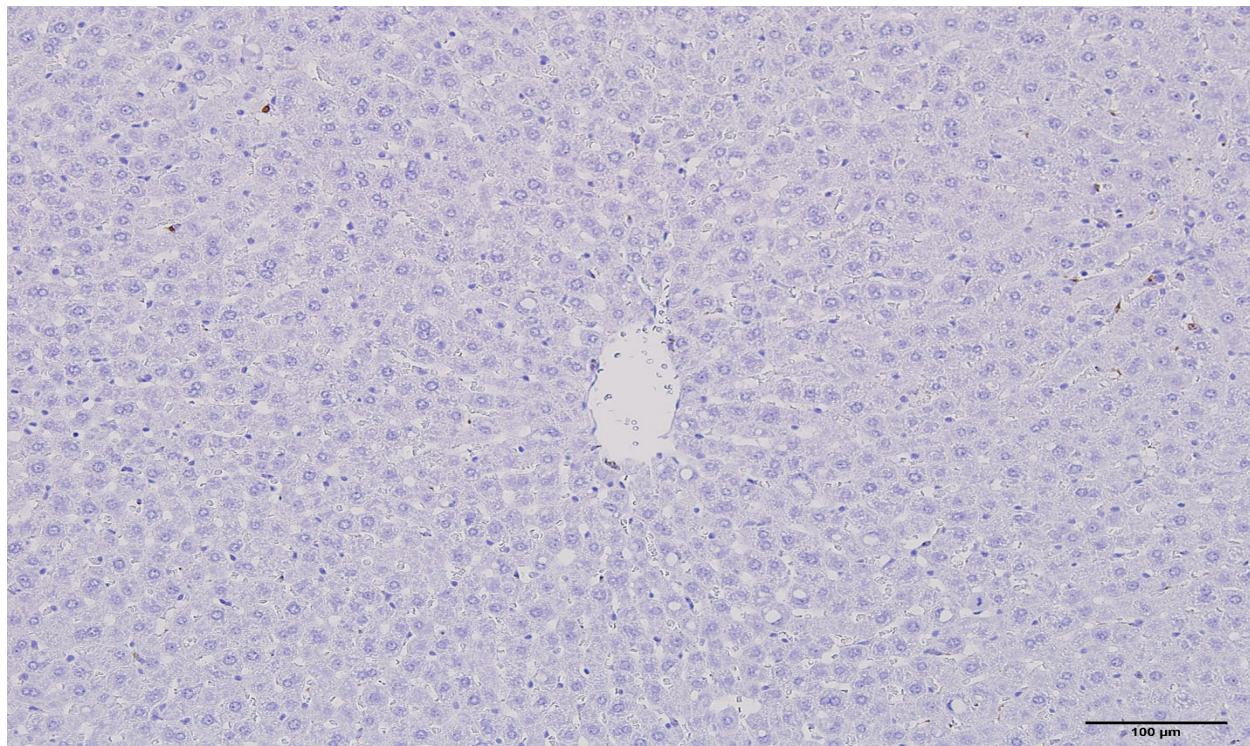

CD68+ Stain Data for Control Animals



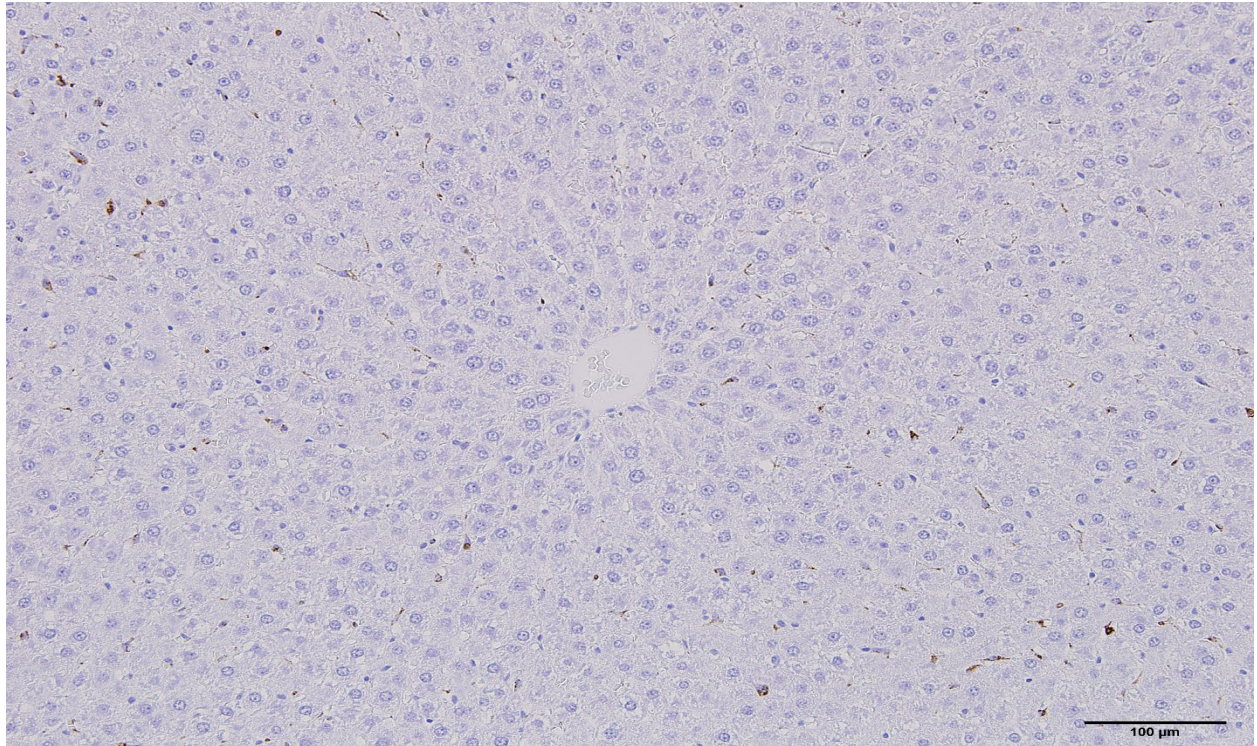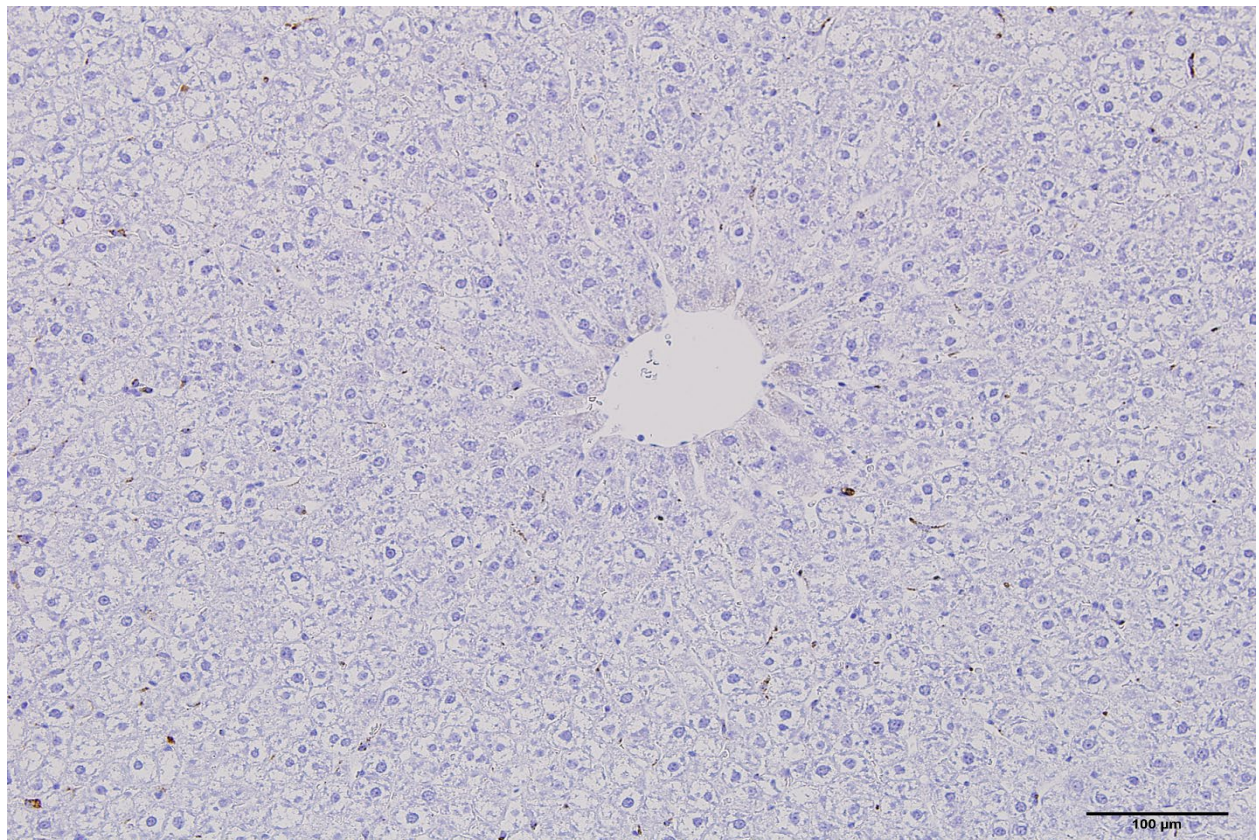

CD68+ Stain Data for LD Animals



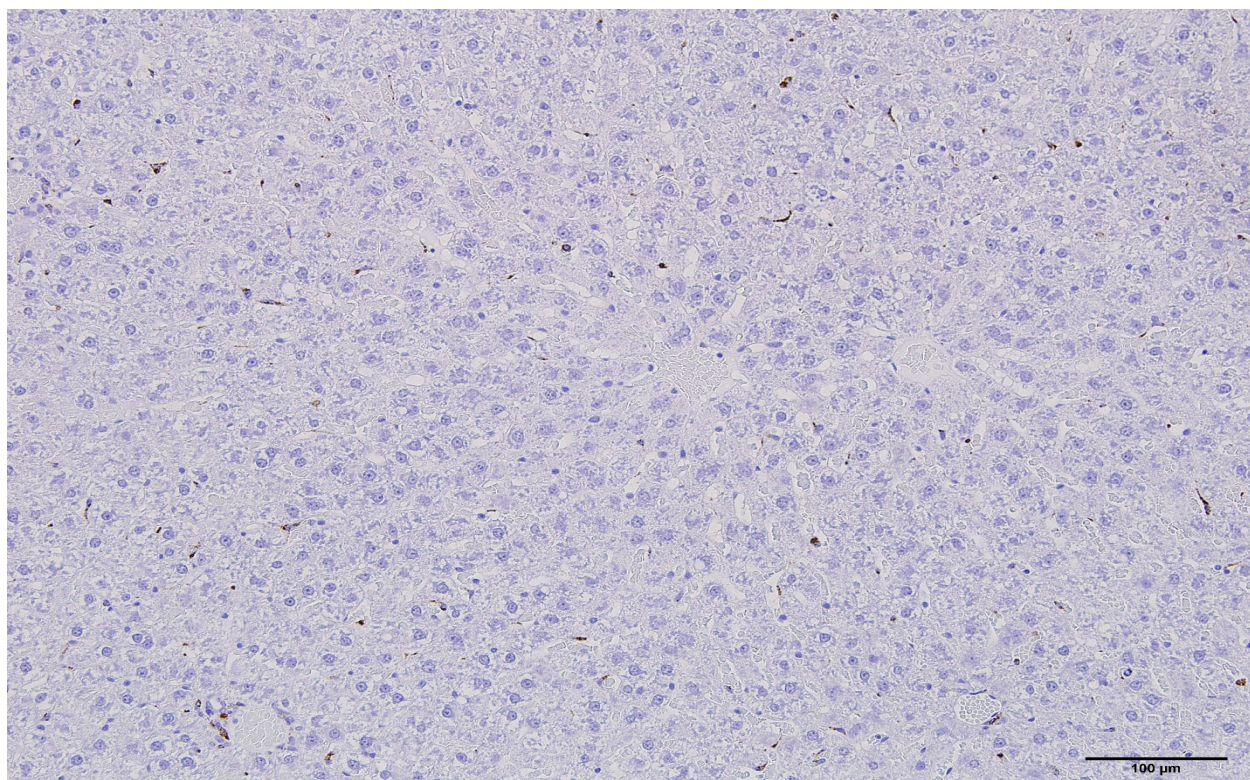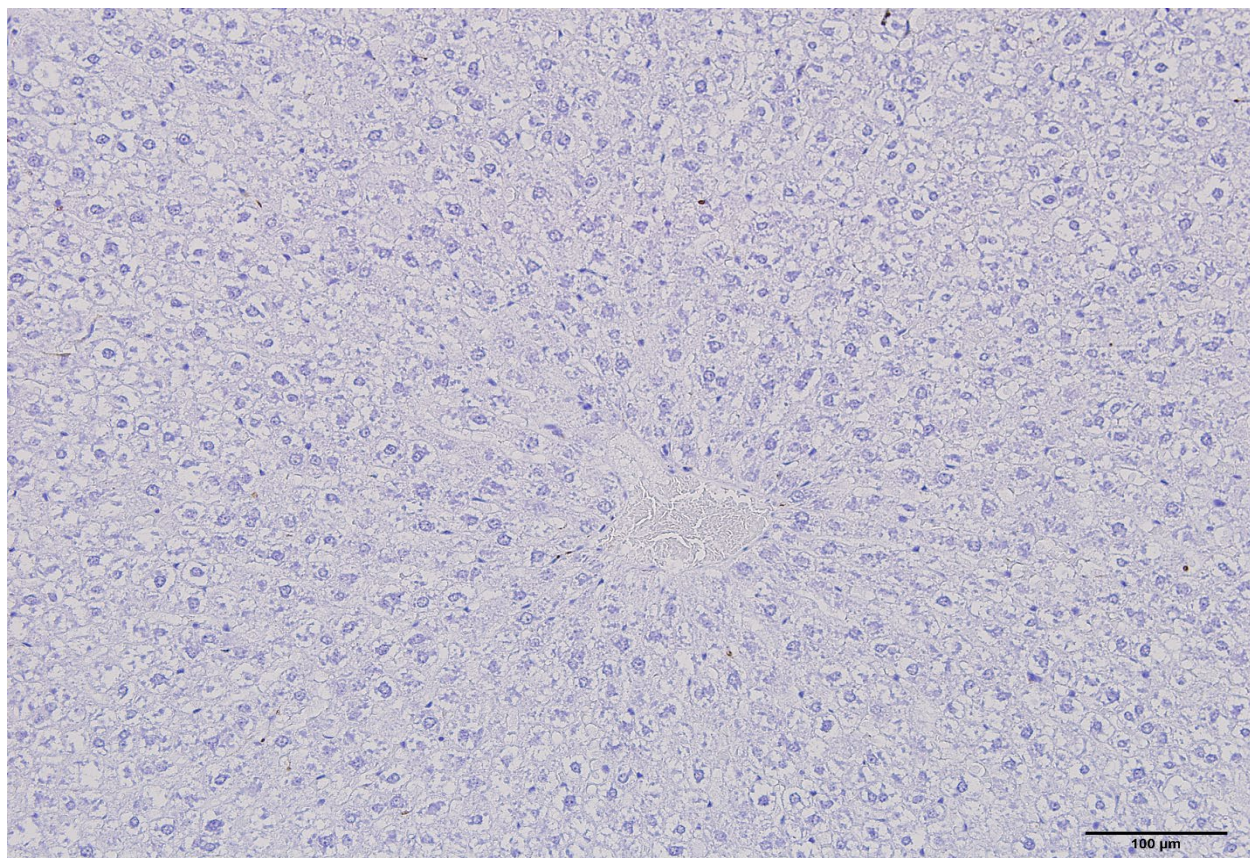

CD68+ Stain Data for HD Animals

Supplement: Supplementary file 1 [file 17823140]
